# Supplementary material for: Developing a machine learning algorithm to predict the probability of aseptic loosening of the glenoid component after anatomical total shoulder arthroplasty: protocol for a retrospective, multicentre study
Source: PubMed Central journal article supplement — BMJ Open. 2023 Oct 18;13(10):e074700. doi: 10.1136/bmjopen-2023-074700 (PMC10603397; doi:10.1136/bmjopen-2023-074700), 2023-10-18
Supplement: bmjopen-2023-074700supp001.pdf [file bmjopen-2023-074700supp001.pdf]

1 **APPENDIX 1**

2 Search strategy:

3 ("Arthroplasty, Replacement, Shoulder"[Mesh] OR "Total shoulder arthroplasty"[tiab] OR "Anatomic  
4 shoulder arthroplasty"[tiab] OR "TSA"[tiab] OR "ATSA"[tiab] OR "Total shoulder prosthes\*"[tiab]  
5 OR "Anatomic shoulder prosthes\*"[tiab]) AND ("Reoperation"[Mesh] OR "reoperation"[tiab] OR  
6 "re-operation"[tiab] OR "revision"[tiab] OR "survival"[tiab] OR "implant-survival"[tiab] OR  
7 "Prosthesis Failure"[Mesh] OR "failure"[tiab] OR "loosening"[tiab] OR "aseptic"[tiab] OR  
8 "Postoperative Complications"[Mesh] OR "complication"[tiab])

9 Filters: Clinical study, Clinical trial, Controlled clinical trial, Comparative study, Dataset

10
